# Supplementary material
Source: ML conference proceedings conference paper supplement (https://openreview.net/forum?id=09nyBqSdUz)

|    | Naive SDXL                                                                         | Ours                                                                                 | IP Adapter                                                                            |
|----|------------------------------------------------------------------------------------|--------------------------------------------------------------------------------------|---------------------------------------------------------------------------------------|
| 0  |     |     |     |
| 1  |    |    |    |
| 2  |    |    |    |
| 3  |    |    |    |
| 4  |    |    |    |
| 5  |    |    |    |
| 6  |    |    |    |
| 7  |    |    |    |
| 8  |   |   |   |
| 9  |  |  |  |
| 10 |  |  |  |
| 11 |  |  |  |
| 12 |  |  |  |
| 13 |  |  |  |
| 14 |  |  |  |
| 15 |  |  |  |
| 16 |  |  |  |
| 17 |  |  |  |

Supplement: supplementary_material [file attachment]

|    | Ours                                                                                | IP Adapter                                                                           | BLIPD                                                                                 |
|----|-------------------------------------------------------------------------------------|--------------------------------------------------------------------------------------|---------------------------------------------------------------------------------------|
| 0  |    |    |    |
| 1  |    |    |    |
| 2  |    |    |    |
| 3  |    |    |    |
| 4  |    |    |    |
| 5  |    |    |    |
| 6  |    |    |    |
| 7  |    |    |    |
| 8  |   |   |   |
| 9  |  |  |  |
| 10 |  |  |  |
| 11 |  |  |  |
| 12 |  |  |  |
| 13 |  |  |  |
| 14 |  |  |  |
| 15 |  |  |  |
| 16 |  |  |  |
| 17 |  |  |  |

Supplement: supplementary_material [file attachment]
